# Supplementary material for: Impacts of Anthropogenic Disturbance on Vegetation Dynamics: A Case Study of Wadi Hagul, Eastern Desert, Egypt
Source: MDPI journal article supplement (doi:10.3390/plants10091906), 2021-09-14
Supplement: s1 [file s1]

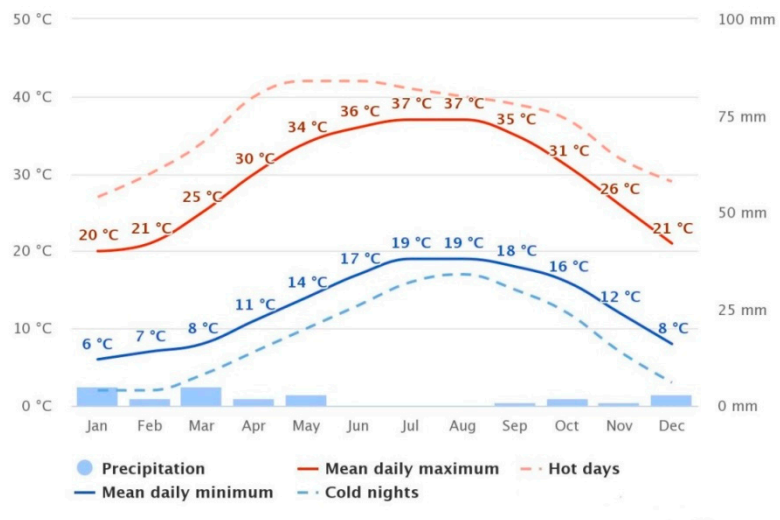

**Figure S1.** Climate diagram of Wadi Hagul (1990–2020): mean maximum temperature (°C), mean minimum temperature (°C), precipitation (mm), hot days (°C), and cold nights.

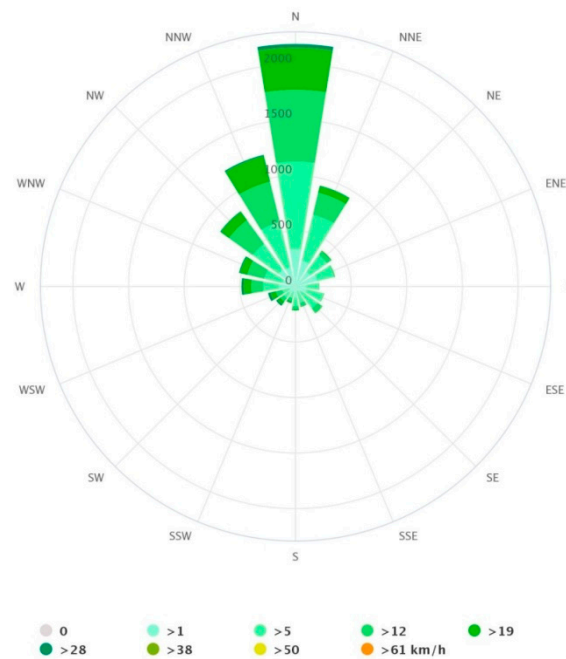

**Figure S2.** Wind direction and velocity in Wadi Hagul (1990–2020).
